# Supplementary material
Source: Springer Nature journal article supplement (https://www.springermedizin.de/resource/supplementary/12936_2008_623_MOESM2_ESM.pdf/9547846)
Supplement: MOESM2 [file 9547846]

# Community Clinics

27% (68,802 / 253,987)

# Hospital Outpatients

15% (24,334 / 168,217)

# Hospital Inpatients

34% (6,022 / 17,823)

Proportion of Patient Workload with Malaria (%)

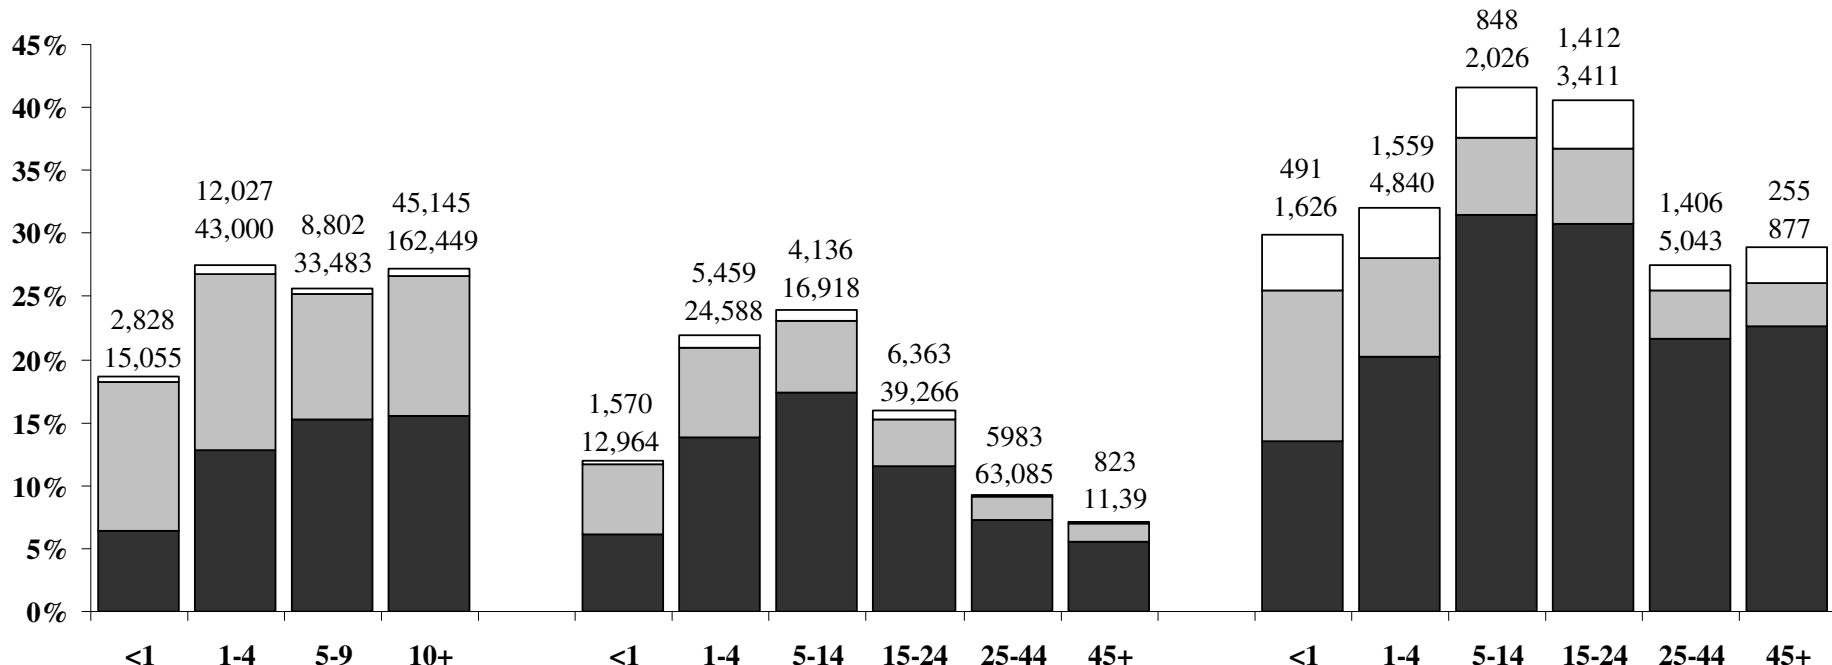

Age Group (Yrs)
